# Supplementary material
Source: Springer Nature journal article supplement (https://www.springermedizin.de/resource/supplementary/12958_2014_1249_MOESM1_ESM.pdf/9567134)

Number of follicles in each diameter class

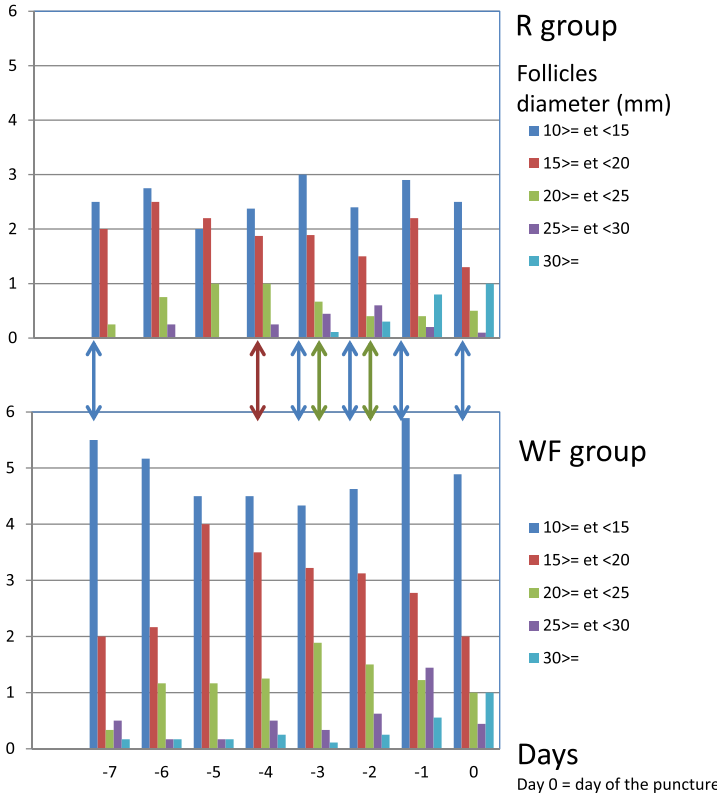

Supplement: MOESM1 [file 9567134]
